1 **Screening the MMV Open Access Pathogen box unveils novel and potent**  
2 **inhibitors of Amoebiasis agent: *Entamoeba histolytica***

3 Rufin Marie Kouipou Toghueo<sup>1</sup>, Darline Dize<sup>1</sup>, Benoît Laleu<sup>2</sup>, Patrick Valere Tsouh Fokou<sup>1</sup>,  
4 Eugenie Aimee Madiesse Kemgne<sup>1</sup>, Fabrice Fekam Boyom<sup>1\*</sup>

5

6 <sup>1</sup>Antimicrobial and Biocontrol Agents Unit (AmBcAU), Laboratory for Phytobiochemistry and  
7 Medicinal Plants Studies, Department of Biochemistry, Faculty of Science, University of Yaoundé  
8 I, P.O. Box 812, Yaoundé, Cameroon.

9 <sup>2</sup>Medicines for Malaria Venture, Route de Pré-Bois 20, PO Box 1826, 1215 Geneva, Switzerland

10 \*Corresponding author: Fabrice Fekam Boyom;

11 Email address: [fabrice.boyom@fulbrightmail.org](mailto:fabrice.boyom@fulbrightmail.org);

12 Tel: +237-677 276 585

13

14

15

16

17

18

19

20 **Abstract**

21 Amoebiasis caused by the protozoan parasite *Entamoeba histolytica* remains a major public health  
22 hazard, as being the second cause of death among parasitic infections. Although currently  
23 prescribed drugs have shown to be effective in the treatment of amoebiasis, side effects and  
24 emergence of parasites resistance prompted the search for novel drug to control this disease. In  
25 this regard, the Medicines for Malaria Venture (MMV) Pathogen Box library of selected  
26 compounds was screened to identify anti-*Entamoeba histolytica* agents using the resazurin based  
27 fluorescence assay. Overall, the results revealed three novel anti-*Entamoeba histolytica* scaffolds  
28 with low micromolar activity including MMV675968 ( $IC_{50} = 2.10 \mu\text{M}$ ), MMV688179 ( $IC_{50} = 2.38$   
29  $\mu\text{M}$ ) and MMV688844 ( $IC_{50} = 5.63 \mu\text{M}$ ). Structure-Activity-Relationship (SAR) studies led to  
30 identification of two analogs ~100 fold more potent and selective than the original hit compound  
31 **1** (MMV675968): **1k** ( $IC_{50} = 0.043 \mu\text{M}$ ) and **1l** ( $IC_{50} = 0.055 \mu\text{M}$ ). Predictive analysis using  
32 Maestro 11.6 suggested that these hit compounds possess acceptable physicochemical and  
33 metabolism properties. These lead compounds are therefore good starting points for lead  
34 optimization studies towards identification of drug candidate against amoebiasis.

35 **Key words:** MMV Pathogen Box, Anti-*Entamoeba histolytica*, Novel scaffolds, Lead compounds

36

37

38

39

40

## 41 **Author Summary**

42 Diarrhoea is a leading cause of death for millions of children worldwide. One of the top 15 causes  
43 of severe diarrhoea is *Entamoeba histolytica*, causing amoebiasis. What makes *E. histolytica*  
44 dangerous is its ability to disseminate easily through a given population via contaminated food and  
45 water supplies. Moreover, *E. histolytica* is quite comfortable in the environment, difficult to kill  
46 with chlorine and infect people at a very low dose, making it a priority pathogen to eradicate. Many  
47 drugs have been developed so far to cure this infection. However, they are not efficient enough to  
48 control the disease due to pathogen resistance that is becoming a big issue. In addition to that,  
49 almost all the drugs in use are highly toxic to human causing several side effects upon medications.  
50 Therefore, new, more efficient and less toxic drugs are urgently needed for the better management  
51 of amoebiasis. Since the development of a new drug takes years, repurposing existing drugs has  
52 been shown to shortcut the process and boost the discovery rate of new medicines. Using this same  
53 approach, we have identified two compounds that potently inhibit *E. histolytica* and are nontoxic  
54 that can enter the drug discovery pipeline for new amoebicidal drug development. Moreover, these  
55 new inhibitors could also serve as starting points for the synthesis of a library of amoebicidal  
56 compounds.

57

58

59

60

61

## 62 **Introduction**

63 Diarrhoea that is credited to have caused approximately 8% of all deaths among children under  
64 age 5 worldwide in 2016 is considered as a leading executioner of children. Basically, the number  
65 of yearly deaths among children is about 480,000, meaning over 1,300 children dying each day  
66 [1]. Amoebiasis caused by the protozoan parasite *Entamoeba histolytica* is listed among the top  
67 15 causes of severe diarrhoea in the first 2 years of life in children living in the developing world  
68 [2]. Moreover, approximately 4 to 10% of the carriers of this amoeba infection develop clinical  
69 symptoms within a year and amoebic dysentery is considered as the third leading cause of death  
70 from parasitic disease worldwide after malaria and schistosomiasis [3-4]. Acute amoebiasis  
71 presents symptoms such as diarrhea with frequent and often bloody stools, whereas chronic  
72 amoebiasis can present gastrointestinal symptoms plus fatigue, weight loss and occasional fever.  
73 Extra-intestinal amoebiasis can occur if the parasite spreads to other organs, most commonly the  
74 liver, where it causes amoebic liver abscesses with fever and right upper quadrant abdominal pain  
75 [5-6].

76 Estimates indicate that *E. histolytica* infects approximately 500 million people worldwide,  
77 resulting in 50 million cases of invasive disease and about 70,000 deaths annually [7-8]. Because  
78 of its easy dissemination through contaminated food and water supplies, in addition to its low  
79 infectious dose, chlorine resistance, and environmental stability, *E. histolytica* is classified as a  
80 category B priority biodefense pathogen by the National Institute of Allergy and Infectious  
81 Diseases [9]. For the control of this infection, the treatment relies on structurally diverse drugs (fig  
82 1) and the administration of the treatment depends on the diagnosis and severity of the illness.  
83 Usually, the drugs are effective for the treatment of invasive amoebiasis, but are less effective in  
84 eliminating parasites located in the intestinal lumen. Overall, in symptomatic patients and in

85 invasive disease, the most widely used drugs against *E. histolytica* are the nitroimidazoles  
86 (metronidazole and tinidazole) [10-12]. However, several side effects are reported, ranging from  
87 vomiting and diarrhea, hallucinations [13], encephalopathy [14] to cancer [15] besides emergence  
88 of resistant strains that have been reported against these drugs [16]. Therefore, to face these  
89 shortcomings, new and better drugs are required to control amoebiasis.

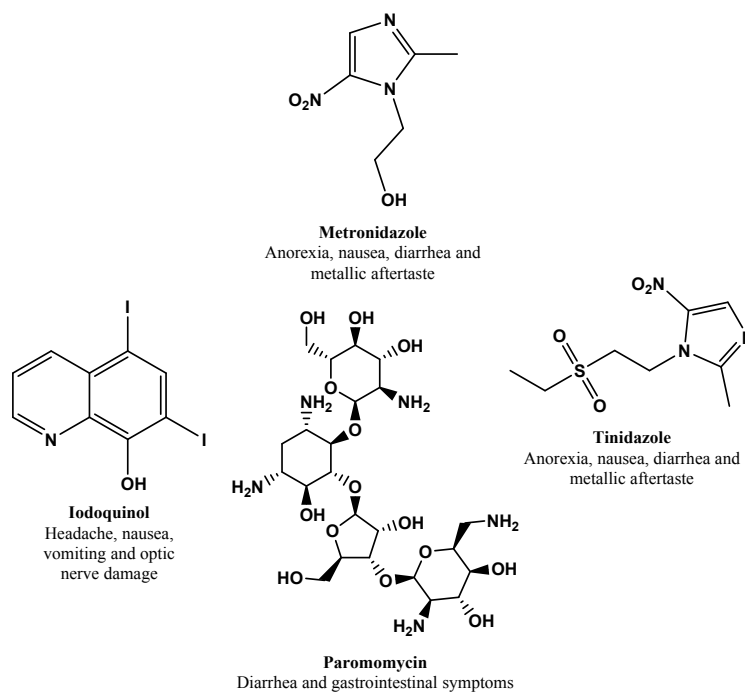

90

91 **Fig 1.** Structure of available drugs against amoebiasis and their respective side effects.

92 Prompt treatment accounts among the global strategy to control infectious diseases including  
93 amoebiasis. However, the efficiency of this intervention highly relies on drugs which should not  
94 only be safe and efficacious, but also affordable, and available to the population in need. Ideally,  
95 any new anti-amoeba agent should bear all the above characteristics. In the quest for such new  
96 treatments against amoebiasis, many strategies have been adopted, including rational drugs design  
97 [17] and screening of synthetic and natural products libraries [8, 18]. Several synthesized and  
98 naturally occurring compounds have been tested, yet there is no molecule considered to be ideal

99 for the treatment of amoebiasis, particularly for the treatment of severe infections [19]. However,  
100 Chacín-Bonilla et al. [20] reported the potential of nitazoxanide prescribed as medication against  
101 *Cryptosporidium parvum* and *Giardia lamblia* infection as a key compound for the therapy against  
102 both luminal and invasive *E. histolytica* forms, although no further study has been reported since.  
103 On another hand, repurposing previously developed drugs or those under development stages  
104 against other parasitic or non-parasitic diseases represents a shortest and cheapest way to accelerate  
105 the discovery of drugs for neglected tropical diseases, including amoebiasis.

106 Within this framework, the Medicines for Malaria Venture (MMV) has made available open access  
107 libraries of hits generated through screening corporates and academic libraries [21]. The success  
108 of this approach went beyond malaria parasites [22-24], where inhibitors of several pathogens of  
109 other diseases including tuberculosis [25-26], schistosomiasis [27-29], those caused by  
110 kinetoplastids [30], cryptosporidiosis [31], toxoplasmosis [32] and cancers [33] were identified.  
111 Based on the same concept, we investigated the MMV Malaria Box which led to identification of  
112 compounds exhibiting moderate inhibition against *Entamoeba histolytica* [32]. Following these  
113 previous footsteps, we hypothesized that the investigation of the MMV Pathogen Box (MMVPB),  
114 consisting in 400 drug-like compounds with low toxicity for mammalian cells and activity against  
115 specific microbial pathogens could lead to identification of hit scaffolds different from those of  
116 the mainstay treatment to feed and accelerate the discovery and development of new anti-  
117 amoebiasis drugs with different modes of action.

## 118 **Methods**

### 119 **Parasites culture and maintenance**

120 The *E. histolytica* strain NR-176 provided by BEI Resources ([www.beiresources.org](http://www.beiresources.org)) was  
121 maintained in culture in Eagle's minimum essential medium (EMEM) (Sigma, Germany)  
122 supplemented with 10% albumin bovine serum (ABS) and 1% penicillin-streptomycin solution.  
123 Parasites were sub-cultured twice weekly. For the assays, cells were harvested by chilling the tube  
124 on ice for 15 min to detach the parasites, and then centrifuged at 300×g for 5 min. The supernatant  
125 was decanted, and cells pellets were resuspended in fresh medium. The number of viable cells was  
126 calculated using a haemocytometer and 0.4% (w/v) trypan blue dye. The criteria for viability were  
127 motility and dye exclusion.

### 128 **The MMVPB compounds library**

129 The Pathogen Box was kindly provided by Medicines for Malaria Venture (MMV, Switzerland)  
130 and consisted in 400 drug-like compounds. Compounds were supplied in 96-well microtiter plate  
131 format containing 20µL/well of 10 mM solution dissolved in 100% DMSO. Intermediary solution  
132 for each compound was prepared in 96-well plate at 100µM by diluting compounds in incomplete  
133 culture medium. All plates were stored at -20°C.

### 134 **Assessment of amoebicidal activity of compounds via resazurin reduction assay**

#### 135 **Determination of *E. histolytica* inoculum size using fluorescence intensity**

136 *E. histolytica* trophozoites at  $9.69 \times 10^3$  cell/mL,  $1.94 \times 10^4$  cell/mL,  $3.88 \times 10^4$  cell/mL,  
137  $7.75 \times 10^4$  cell/mL, and  $1.55 \times 10^5$  cell/mL in 100µL were added in triplicate in the 96-wells flat-  
138 bottomed plates and incubated for 48 h at 37°C in an atmosphere of 5% CO<sub>2</sub>. Upon 48 h of  
139 incubation, 10 µL of resazurin (0.15mg/mL) were added and mixed gently and incubated in the  
140 dark at 37°C for 30 min. Fluorescence was subsequently measured using Infinite M200 plate reader  
141 (Tecan) with excitation and emission at 530 and 590 nm respectively.

## 142 Assay validation through Z-factor determination

143 To validate our resazurin reduction assay, the statistical effect size (Z-factor) was calculated. In a  
144 96 wells plate format, *E. histolytica* ( $2 \times 10^4$  cells/mL) was cultured in Eagle's minimum essential  
145 medium (EMEM) (Sigma, Germany) supplemented with 10% albumin bovine serum (ABS) and  
146 1% penicillin-streptomycin solution for 48 h at 37°C, 5% CO<sub>2</sub>. After 48h incubation, 10 µL  
147 resazurin at 0.01% (wt/vol) were added in each well and incubated in the dark for 30 min at 37°C.  
148 Plates were scanned using a Tecan Infinite M200 fluorescence multi-well plate reader (Männedorf,  
149 Switzerland) with excitation and emission at 530 and 590 nm respectively. More than 30 replicate  
150 of the negative control (Parasite-free inhibitor), positive control (1mg/mL metronidazole in 100%  
151 DMSO) and the blank (medium-free parasite) were prepared. The assay was performed twice and  
152 the data were used to calculate the Z-factor using the formula:

$$Z - factor = 1 - \frac{3(\sigma_p + \sigma_n)}{|\mu_p - \mu_n|}$$

153 Where  $\sigma_p$  and  $\sigma_n$  are the standard deviations of the positive and negative controls respectively, and  
154  $\mu_p$  and  $\mu_n$  are the corresponding mean values. A Z-factor between 0.5 and 1.0 indicates an excellent  
155 assay and statistically reliable separation between the positive and negative controls.

## 156 Determination of Single Point Growth Inhibition of the MMVPB compounds

157 Screening of the 400 compounds was conducted in 96-well sterile polystyrene flat-bottom  
158 microtiter plates (Corning). *E. histolytica* culture at  $2 \times 10^4$  cells/mL was exposed to 10 µM drug in  
159 a final volume of 100 µL of EMEM per well. Plates were incubated at 37°C under an atmosphere  
160 of 5% CO<sub>2</sub> for 48h. Metronidazole at 1 mg/mL and 0.4% DMSO were used respectively as positive  
161 and negative controls. After 48 h of incubation, 10µL of resazurin (0.15 mg/mL) (Sigma, USA)  
162 were added to each well, mixed gently, and incubated in the dark at 37°C for 30 min. Subsequently



163 fluorescence was measured using a Tecan Infinite M200 fluorescence multi-well plate reader  
164 (Austria) with excitation and emission at 530 and 590 nm, respectively. Tests were performed in  
165 three independent experiments. Compounds with inhibition percentage  $\geq 70\%$  were selected for  
166 dose-response assay.

#### 167 **Dose-Response Growth Inhibition assay of the selected MMVPB Compounds**

168 Median inhibitory concentrations ( $IC_{50}$ ) of the selected MMVPB compounds were determined as  
169 described above, with little modifications consisting in tested concentrations ranging from 0.02-  
170 25 $\mu$ M for compounds and 1.11-584.24  $\mu$ M for the reference drug (metronidazole). Experiments  
171 were performed in triplicate and repeated twice. Dose-response curves were constructed by  
172 plotting mean percent inhibition calculated from the fluorescence counts versus the drug  
173 concentrations, and activity was expressed as 50% inhibitory concentration ( $IC_{50}$ ) using the IC  
174 Estimator-version 1.2 software.

#### 175 **Cytotoxicity study of potent anti- *Entamoeba histolytica* compounds**

176 The cytotoxicity of anti-amoebic compounds was assessed using the MTT assay [34], targeting  
177 Vero cells line (ATCC<sup>®</sup> CCL-81<sup>™</sup>) cultured in complete medium containing 13.5 g/L EMEM  
178 (Gibco, Waltham, MA USA), 10% foetal bovine serum (Gibco, Waltham, MA USA), 0.21%  
179 sodium bicarbonate (Sigma-Aldrich, Waltham, MA USA) and 50 $\mu$ g/mL gentamicin (Gibco,  
180 Waltham, MA USA). Essentially, Vero cells at  $10^4$  cells/200 $\mu$ L/well were seeded into 96-well flat-  
181 bottomed tissue culture plates (Corning, USA) in complete medium. Fifty  $\mu$ L of serially diluted  
182 compounds solutions (concentrations  $\leq 50\mu$ M) were added after 24 h of seeding then incubated  
183 for 48 h in a humidified atmosphere at 37°C and 5% CO<sub>2</sub>. DMSO was added as negative inhibitor  
184 at 0.4% (v/v). Twenty  $\mu$ L of a stock solution of MTT (5mg/mL in 1X phosphate buffered saline)

185 were added to each well, gently mixed, and incubated for an additional 4 h. After spinning the  
186 plate at 1,500 rpm for 5 min, the supernatant was carefully removed and 100  $\mu$ L of 100% DMSO  
187 (v/v) were added. Formazan formation was measured on a Magelan Infinite M200 fluorescence  
188 multi-well plate reader (Tecan) at 570 nm. The 50% cytotoxic concentrations ( $CC_{50}$ ) of compounds  
189 were determined by analysis of dose – response curves using GraphPad Prism 7.0. The selectivity  
190 Indices ( $CC_{50}$  Mammalian cell/ $IC_{50}$  *E. histolytica*) were calculated for each compound.

### 191 **Statistical analysis**

192 The data was analysed in Microsoft Excel and Prism 7.0 software (GraphPad Software, San Diego,  
193 CA). A nonlinear regression sigmoidal dose-response curve fit was applied to dose-response data  
194 for both 50% inhibitory concentration and 50% cytotoxic concentration.

### 195 **Results**

#### 196 **Choice of *E. histolytica* inoculum size for the assays**

197 The correlation coefficient of the line was 0.953 (fig 2), indicating a linear response between  
198 cell/parasite number and fluorescence values at 530 nm (excitation) and 590 nm (emission).

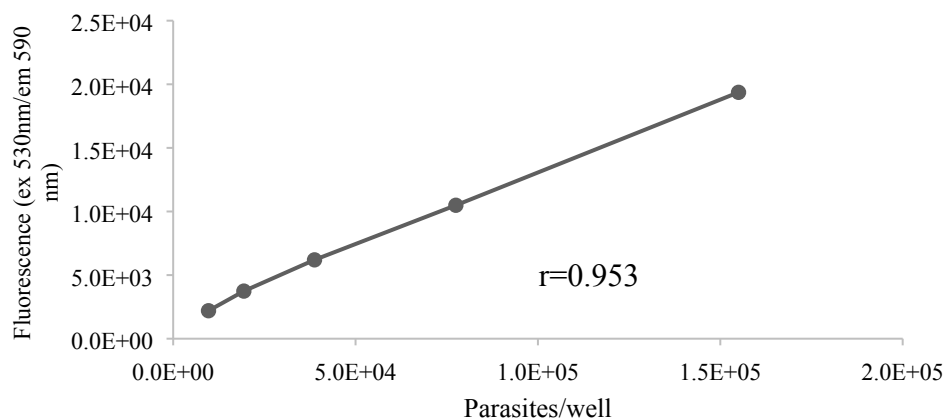

199 Fig 2. Correlation of *E. histolytica* inoculum size with fluorescence values at 530 nm (excitation)  
200 and 590 nm (emission) measured using the Resazurin Assay. Different inoculum sizes of *Entamoeba*  
201 *histolytica* parasites were added in triplicate to the wells of a 96-well plate in EMEM supplemented with 10% ABS,  
202 and 1% penicillin-streptomycin. The medium was allowed to equilibrate for 48 h; then 10 $\mu$ l/well of Resazurin Reagent  
203 was added. After 30 min at 37°C in a humidified, 5% CO<sub>2</sub> atmosphere, the fluorescence at 530 nm (excitation) and  
204 590 nm (emission) was recorded using an Infinite M200 plate reader (Tecan). Each point represents the mean  $\pm$  SD  
205 of 3 replicates.

### 206 **Z-factor value for assay validation**

207 The quality of the screen was evaluated using the Z-factor based on the percent inhibition against  
208 *E. histolytica* between the 1.0% DMSO and 1mg/mL metronidazole-treated parasites taken as the  
209 negative and positive controls respectively. Fig 3 shows the scatter-plot distribution of the percent  
210 inhibition for 1.0% DMSO and 1mg/mL metronidazole. The average Z-factor between the 0.4%  
211 DMSO and 1mg/mL metronidazole in the 96-well test plates was 0.66 (fig 3) indicating that the  
212 assay could reliably separate positive and negative controls. These findings supported the  
213 feasibility of our drug screening assay for use in *E. histolytica* screening.

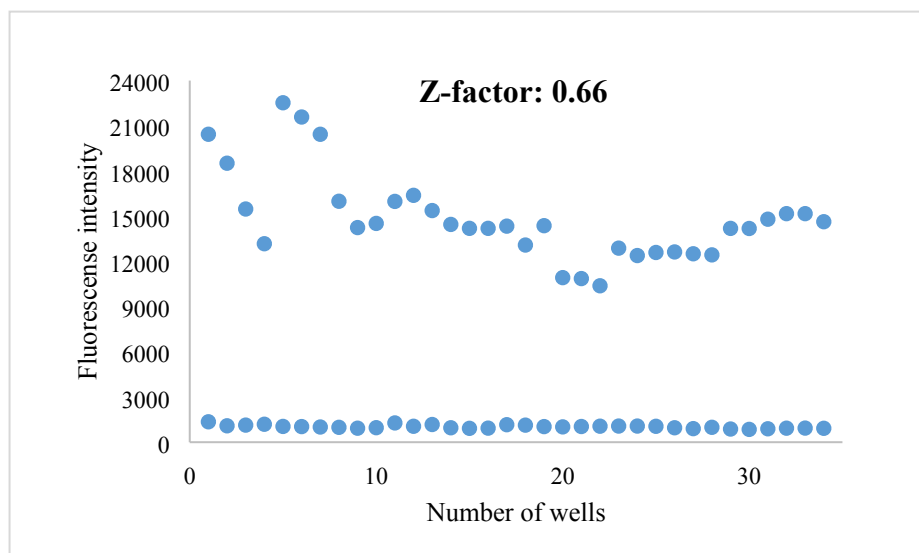

214 **Fig 3. Screening validation.** The Z-factor of 0.66 demonstrates an excellent assay respectfully to the guidance defined by  
215 Zhang et al. (1999) indicating that for  $0.5 \leq Z < 1$ , there is a good separation of the distributions between the signal of negative and  
216 positive controls, indicating an excellent assay.

217

218 **Screening of the Pathogen Box against *E. histolytica* identifies MMV675968, MMV688179**  
219 **and MMV688844 as potent hits**

220 The preliminary screening of the MMVPB led to the identification of six compounds exhibiting  
221 percent inhibition ranging 96-100% against *E. histolytica* in culture including, MMV688978  
222 (Auranofin), MMV688775 (Rifampicin), MMV687798 (Levofloxacin (-)-ofloxacin),  
223 MMV675968 (compound 1), MMV688179 (compound 2) and MMV688844 (compound 3).  
224 Besides, three other compounds including Linezolid (MMV687803), MMV272144 (compound 4)  
225 and MMV393995 (compound 5) weakly inhibited the growth of the parasites at the same  
226 concentration. The 9 compounds were selected and submitted to dose-response studies as  
227 described above. The results achieved indicated, with the exception of compounds 4 and 5, that 7  
228 compounds could inhibit the growth of *E. histolytica* with  $IC_{50}$  values ranging below 10  $\mu$ M (Table  
229 1).

230 Table 1: Anti-*E. histolytica* activity profile of nine selected MMVPB compounds

| <b>*MMV ID</b> | <b>Common name or manuscript ID</b> | <b>IC<sub>50</sub> (μM)</b> | <b>#CC<sub>50</sub> (μM)</b> | <b>SI (CC<sub>50</sub>/IC<sub>50</sub>)</b> | <b>Molecular weight (g/mol)</b> | <b>*cLogP</b> | <b>** Known biological activity</b> |
|----------------|-------------------------------------|-----------------------------|------------------------------|---------------------------------------------|---------------------------------|---------------|-------------------------------------|
| MMV688978      | Auranofin                           | 0.07±0.01                   | >50                          | >714.29                                     | 678.48                          | 1.40          | Rheumatoid arthritis/Amoebiasis     |
| MMV688775      | Rifampicin                          | 0.05±0.00                   | >50                          | >1000                                       | 822.94                          | 1.29          | Tuberculosis/ Buruli ulcer          |
| MMV687798      | Levofloxacin(-)-ofloxacin           | 0.045±0.00                  | >50                          | >1111.11                                    | 361.37                          | -0.34         | Broad-spectrum antibiotic           |
| MMV675968      | 1                                   | 2.10±0.37                   | >50                          | >23.80                                      | 359.81                          | 2.31          | Cryptosporidiosis                   |
| MMV688179      | 2                                   | 2.38±0.64                   | 35.43±1.17                   | 14.88                                       | 476.19                          | 2.87          | Kinetoplastids                      |
| MMV688844      | 3                                   | 5.63±0.6                    | >50                          | >8.88                                       | 424.92                          | 3.83          | Tuberculosis                        |
| MMV687803      | Linezolid                           | 9.17±1.91                   | >50                          | >5.45                                       | 337.35                          | 0.52          | Tuberculosis                        |

|               |   |            |            |       |        |       |              |
|---------------|---|------------|------------|-------|--------|-------|--------------|
| MMV272144     | 4 | 13.37±0.68 | 16.98±1.23 | 1.27  | 254.27 | -0.27 | Tuberculosis |
| MMV393995     | 5 | 11.56±0.07 | >50        | >4.32 | 204.23 | 1.10  | Tuberculosis |
| Metronidazole | - | 9.34±0.21  | -          | -     | 171    | -     | Amoebiasis   |

231 \*cLogP=  $\log(C_{\text{octanol}}/C_{\text{water}})$ , is the measure of the compound's hydrophilicity; \*\*Known activity of compounds against other diseases. IC<sub>50</sub> obtained

232 from two independent experiments performed in triplicate each; #CC<sub>50</sub> values of compounds against Vero cell line.

233 Interestingly, among the six compounds that significantly inhibited *E. histolytica* with IC<sub>50</sub> values  
234 ranging 0.045-5.63 μM, three are approved drugs. In fact in this study, Auranofin (MMV688978)  
235 completely prevented *E. histolytica* proliferation (100% inhibition) over the incubation time frame.  
236 This finding was not surprising given that Auranofin which is used for the management of  
237 rheumatoid arthritis has recently been repurposed as drug for the treatment of amoebiasis [18]. As  
238 a result, the activity of Auranofin against *E. histolytica* growth further validated our screening  
239 approach. Rifampicin (MMV688775) is an important antibiotic drug used for the treatment of  
240 buruli ulcer and tuberculosis, and Levofloxacin (-)-ofloxacin (MMV687798), a broad-spectrum  
241 antibiotic of the fluoroquinolone class known to exhibit bactericidal activity.

242 Of particular interest, this study has allowed to identify three hits showing selectivity indexes  
243 >8.88 against Vero cell lines and low micromolar activity against *E. histolytica*: IC<sub>50</sub>= 2.10 μM,  
244 2.38 μM, and 5.63 μM for compounds 1, 2 and 3 respectively. These compounds are being reported  
245 here for the first time as having amoebicidal activity (Fig 4; Table 1). Given their lipophilicity in  
246 an acceptable range (cLogP 2.31-3.83) and small molecular weight (MW 359-476), they might  
247 represent novel and attractive anti- *E. histolytica* chemical starting points for medicinal chemistry  
248 efforts and therefore deserve further attention.

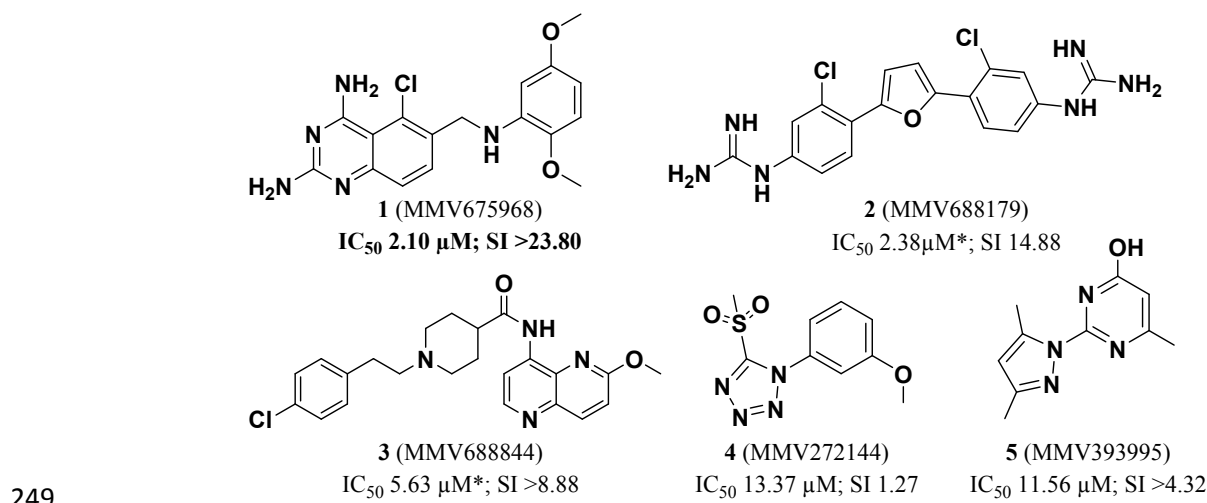

250 **Fig 4.** Structures and activity of novel amoebicidal compounds identified from the screening of  
251 the Pathogen Box (\*activity not reconfirmed on resynthesized hits)

252 **Screening of resynthesized hits and their analogs identifies two highly potent *E. histolytica***  
253 **inhibitors: MMV1578523 (1k) and MMV1578540 (1l)**

254 In an attempt to confirm their potency upon retesting, and identify more potent and selective anti-  
255 amoebic hits, compounds **1**, **2** and **3** were resynthesized and fresh DMSO solutions were prepared  
256 from solid samples before testing against *E. histolytica* as described above.

257 Surprisingly upon testing, the activity was not confirmed for compounds **2** and **3** since a complete  
258 loss of inhibitory effect against *E. histolytica* was observed at concentrations below 25 μM. Further  
259 investigation through available structural analogs of these 2 hits did not show any inhibition  
260 against *E. histolytica* while their cytotoxicity values were significant (see Supporting Information).

261 These results suggest that primary activity observed for compounds **2** and **3** might be due to their  
262 cytotoxicity or to degradation of the compound under the storage condition of the Pathogen Box.

263 Therefore, they may not be suitable inhibitors against the target parasite. The loss of potency of  
264 resynthesized hits is one of the main challenges encountered during hit identification and lead



265 discovery phase of the drug discovery process. This observation led Hughes et al. [35] to define a  
266 true ‘hit’ molecule as a compound which has the desired activity in a compound screen and whose  
267 activity is confirmed upon retesting. This is as true as the success to identify candidate molecules  
268 for clinical development depends upon the stability of the potency over time.

269 Upon retest, compound **1** showed a 3.6-fold decrease in potency ( $IC_{50}$  from 2.100 to 7.495  $\mu$ M) as  
270 well as the selectivity against Vero cell line (SI 5.5). Although slightly disappointed by this loss  
271 of potency, this activity level confirmed to be below 10  $\mu$ M prompted us to test structural analogs  
272 of compound **1**. This has allowed to establish rudimentary structure-activity-relationship (SAR)  
273 and to identify two analogs ~100 fold more potent than the parent hit compound.

#### 274 **Structure activity relationship**

275 Twenty-three analogs of compound **1** were available as solids from MMV as part of the Pathogen  
276 Box initiative and tested against *E. histolytica* as an opportunistic approach (see Supporting  
277 Information for data on all compounds). The key results allowing to establish very preliminary  
278 SAR around compound **1** are summarized in Table 2 below.

279 Compounds **1a-1d** show different substitution pattern around the phenyl moiety of the hit  
280 compound **1** while keeping unchanged the 5-chloro-2,4-diaminoquinazoline core. Among these  
281 structural analogs, **1b** was found to be the most potent ( $IC_{50}$ = 0.123  $\mu$ M). This 61-fold increase in  
282 potency vs. the hit compound **1** results from incorporation of an *ortho*-methoxy as the only  
283 substituent of the phenyl moiety. Replacement of this methoxy with a methyl group did not result  
284 in significant activity improvement (compound **1d**).

285 The additional analogs depicted in Table 2 deal with modifications of the core moiety. Removal  
286 of the chlorine atom from compounds **1a** and **1c** led to complete loss of activity in compounds **1e**

287 and **1g** at concentrations below 25  $\mu$ M. Moreover, removal of the chlorine atom from the most  
288 potent analogue **1b** led to compound **1f**, showing about 22-fold decrease in activity. Overall, these  
289 activity changes indicate that the chlorine atom is critical for activity maintenance.

290 **Table 2: Amoebicidal activity, selectivity and predictive ADME parameters of compound 1 (MMV675968) and structural**  
 291 **analogs**

| Compounds | Chemical Structure                                                                  | IC <sub>50</sub><br>( $\mu$ M) | CC <sub>50</sub><br>( $\mu$ M) | QPlogS | QPlogHERG | QPPCaco | QPlogBB | QPPMDCK | cLogP | QPlogKhsa | HOA |
|-----------|-------------------------------------------------------------------------------------|--------------------------------|--------------------------------|--------|-----------|---------|---------|---------|-------|-----------|-----|
| 1         | 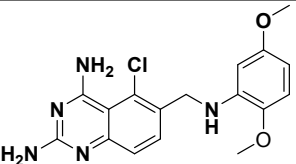   | 7.495*                         | 41.27                          | -4.061 | -5.464    | 343.441 | -1.282  | 267.239 | 2.41  | -0.106    | 3   |
| 1a        |    | <b>0.357</b>                   | 24.77                          | -4.06  | -5.471    | 316.921 | -1.325  | 245.526 | 2.68  | -0.117    | 3   |
| 1b        |   | <b>0.123</b>                   | >50                            | -3.788 | -5.587    | 338.88  | -1.197  | 260.693 | 2.8   | -0.148    | 3   |
| 1c        |  | 5.104                          | >50                            | -3.138 | -5.503    | 96.13   | -1.719  | 67.708  | 2.8   | -0.383    | 2   |

|    |  |       |      |        |        |         |        |         |      |        |   |
|----|--|-------|------|--------|--------|---------|--------|---------|------|--------|---|
| 1d |  | 4.567 | >50  | -4.065 | -5.692 | 371.154 | -1.099 | 310.498 | 3.42 | -0.063 | 3 |
| 1e |  | >25   | 4.66 | -      | -      | -       | -      | -       | -    | -      | - |
| 1f |  | 2.716 | 2.04 | -3.459 | -5.727 | 273.028 | -1.41  | 121.606 | 2.24 | -0.223 | 3 |
| 1g |  | >25   | 3.00 | -      | -      | -       | -      | -       | -    | -      | - |
| 1h |  | 7.670 | 1.59 | -3.524 | -5.678 | 299.034 | -1.291 | 134.173 | 2.86 | -0.158 | 3 |
| 1i |  | >25   | >50  | -      | -      | -       | -      | -       | -    | -      | - |

|    |                                                                                   |              |       |        |        |         |        |         |      |        |   |
|----|-----------------------------------------------------------------------------------|--------------|-------|--------|--------|---------|--------|---------|------|--------|---|
| 1j | 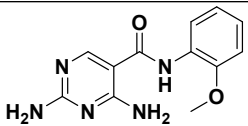 | >25          | >50   | -      | -      | -       | -      | -       | -    | -      |   |
| 1k |  | <b>0.043</b> | 32.01 | -2.351 | -4.979 | 273.26  | -1.314 | 121.718 | 0.82 | -0.514 | 3 |
| 1l |  | <b>0.055</b> | >50   | -2.334 | -4.957 | 250.144 | -1.352 | 110.628 | 0.82 | -0.522 | 3 |

292  $IC_{50}$  obtained from three independent experiments performed in triplicate each; # $CC_{50}$  values of compounds against Vero cell line; \*Hit compound from the screening of the  
293 Pathogen Box ( $IC_{50}$  2.10  $\mu$ M from the DMSO solution provided by MMV); MW: Molecular weight of the compounds; QPlogS: Predicted aqueous solubility, log S. S in mol  
294  $dm^{-3}$  is the concentration of the solute in a saturated solution that is in equilibrium with the crystalline solid (recommended values: -6.5 – 0.5); QPlogHERG: Predicted  $IC_{50}$   
295 value for blockage of hERG  $K^+$  channels (recommended values: concern below -5); QPPCaco: Predicted apparent Caco-2 cell permeability in nm/sec. Caco2 cells are a model  
296 for the gut-blood barrier (Range: <25 poor and >500 great); QPlogBB: Predicted brain/blood partition coefficient (recommended values: -3.0 – 1.2); QPPMDCK: Predicted  
297 apparent MDCK cell permeability in nm/sec. MDCK cells are considered to be a good mimic for the blood brain barrier (Range: <25 poor and >500 great); QPlogKhsa:  
298 Prediction of binding to human serum albumin (range: -1.5 – 1.5); HOA: Human Oral Absorption Predicted qualitative human oral absorption: 1, 2, or 3 for low, medium, or  
299 high respectively. LogP: lipophilicity (recommended values: LogP <5).

300 Interestingly, 2,4-diaminopyrimidine as core moiety led to a dramatic improvement in potency  
301 with compounds **1k** and **1l** showing 3- and 93-fold activity increase respectively when compared  
302 to their 5-chloro-2,4-diaminoquinazoline analogs **1b** and **1c**. Overall, screening of the available  
303 analogs of the hit compound **1** has allowed to improve the *in vitro* potency against *E. histolytica*  
304 by 147-fold.

305 **1l** and **1k** constitute promising starting points. However, it would be key to assess the scope for  
306 modifications around the phenyl moiety and to determine which functionalities could be tolerated.  
307 Removal of the benzylic position in compounds **1k** and **1l** by incorporation of an amide  
308 functionality resulted in complete loss of activity for **1i** and **1j**. The length and rigidity of the spacer  
309 connecting the diaminopyrimidine core to the methoxyphenyl group deserves also further  
310 investigation.

## 311 **Discussion**

312 In the quest for new drugs against infectious diseases, repurposing existing active principles is  
313 among the novel and fast-track approaches in drug discovery research. This approach significantly  
314 reduces the time frame, cost, effort and clinical failure risk associated with conventional drug  
315 discovery approaches [36]. In fact, repurposing unsuccessful drug candidates and existing drugs  
316 has successfully discover new active approved drugs for other indications [37].

317 In the present study, some MMVPB compounds have shown highly potent activity against *E.*  
318 *histolytica*, the causative agent of amoebiasis. Auranofin (MMV688978) was identified to exhibit  
319 very good amoebicidal activity ( $IC_{50}$ = 0.07  $\mu$ M). This result corroborates a recent report of potent  
320 activity of Auranofin against *E. histolytica* with  $IC_{50}$  value 10-fold better *in vitro* than  
321 metronidazole (0.5 vs 5 $\mu$ M) [18], the best treatment for amoebiasis, together with tinidazole.

322 Auranofin exerts its action through the inhibition of reduction/oxidation (redox) enzymes that are  
323 essential for maintaining intracellular levels of reactive oxygen species. This inhibition leads to  
324 cellular oxidative stress and intrinsic apoptosis [38-41]. Through this mechanism of action,  
325 Auranofin has been reported as potential drug lead against several diseases including cancer,  
326 neurodegenerative disorders, HIV/AIDS, parasitic and bacterial infections [41].

327 Also, two of the hits that were identified in this study, MMV688775 (Rifampicin) and  
328 MMV687798 (Levofloxacin (-)-ofloxacin) exhibited potent amoebicidal activities ( $IC_{50}$  of 0.05  
329  $\mu$ M and 0.045  $\mu$ M respectively). They are well known for their broad-spectrum antibiotic activity  
330 against a variety of bacterial pathogens. However, their amoebicidal properties have not been  
331 reported before. Three other MMVPB compounds exerted significant activity against *E.*  
332 *histolytica*. Compound **2** ( $IC_{50}$  of 2.38  $\mu$ M) is thought to be a DNA groove binder as likely  
333 mechanism of action, and is active against several bacterial and fungal pathogens [42]. Besides,  
334 this compound was among the seven MMV Pathogen Box compounds that exhibited bacteriostatic  
335 or bactericidal activity against *Burkholderia pseudomallei*, the causative agent of melioidosis, a  
336 disease that requires long-term treatment regimens with no assurance of bacterial clearance [43].  
337 To a lesser extent, compound **3** also exhibited promising activity against *E. histolytica* ( $IC_{50}$   
338 5.63 $\mu$ M). It was originally identified as non-cytotoxic *Mycobacterium tuberculosis* hit in  
339 GlaxoSmithKline (GSK) whole cell screens and was predicted, based on *in silico* analyses, to  
340 target ABC transporters (Rv0194) in *M. tuberculosis* [26, 44] also involved in the resistance  
341 mechanisms of several parasitic protozoa including *E. histolytica* [45]. This compound also  
342 showed potency against non-tuberculous mycobacteria (*M. abscessus* and *M. avium*) [46-47] and  
343 other intestinal protozoan parasites such *Giardia lamblia* and *Cryptosporidium parvum* [48].

344 Compound **1** (MMV675968) has previously been reported to have anti-cryptosporidiosis activity  
345 and to target the dihydrofolate reductase (DHFR) in *Pneumocystis carinii* and *Toxoplasma gondii*  
346 [49-50]. Moreover, the chemical structure of compound **1** show some similarity to piritrexim and  
347 trimetrexate, two nonclassical folic acid inhibitors approved for the treatment of *Pneumocystis*  
348 *carinii* infection in AIDS patients [51]. A recent interrogation of the MMV Pathogen Box has  
349 identified **1** as the most active of the box compounds against *Toxoplasma gondii* with IC<sub>50</sub> of  
350 0.02μM and a selectivity index of 275 [52]. This compound was also identified as a dual hit of  
351 *Cryptosporidium parvum* and *Giardia lamblia* with 88% and 90% inhibition respectively in the  
352 initial screen of the box compounds by Hennessey et al. [48]. Another study by Lim et al. [53] has  
353 found compound **1** among the 13 most potent MMV Pathogen Box compounds against *Madurella*  
354 *mycetomatis*, a fungus primarily reported in Central Africa as the causative agent of mycetoma in  
355 humans, which is a chronic infectious and inflammatory disease. Beyond the numerous activities  
356 reported of compound MMV675968, it was also showed in this study to be active against *E.*  
357 *histolytica* with IC<sub>50</sub> of 2.10μM, rationally inhibiting the amoebal DHFR enzyme as suggested by  
358 the findings of Lau et al. [50]. In fact, competitive inhibitors of DHFR are used in the  
359 chemotherapy or prophylaxis of many protozoan pathogens, including the eukaryotic parasites  
360 *Plasmodium falciparum*, *Entamoeba histolytica* and *Toxoplasma gondii* [50].

361 It is likely that lead compounds identified in this study inhibits *Entamoeba histolytica* through  
362 inhibition of the enzyme dihydrofolate reductase. In fact, the enzyme dihydrofolate reductase  
363 (DHFR) catalyzes the reduction of folate to dihydrofolate(DHF) and DHF to tetrahydrofolate  
364 (THF) by use of the cofactor NADPH. The methylenated form of THF serves as a carbon donor  
365 for the synthesis of thymidylic acid in a reaction catalyzed by thymidylate synthase (TS). Knowing  
366 that thymidylic acid is essential for DNA synthesis, blocking of either DHFR or TS activity will



367 lead to cell death [54]. Indeed, success of DHFR inhibitors in treating various infectious diseases  
368 can be attributed to the divergence in the DHFR sequence, which imparts a high degree of  
369 selectivity for certain antifolates for one organism versus others. This could be particularly  
370 important for parasitic protozoa, which, unlike humans, express DHFR as part of a bifunctional  
371 enzyme containing both DHFR and TS activity in two domains of the same polypeptide joined by  
372 a linker [55]. This structural and mechanistic distinction of protozoan DHFRs offers a unique  
373 opportunity to develop new drug with greater selectivity [51].

374 Considered as a promising starting point for drug discovery against *E. histolytica*, a preliminary  
375 hit expansion was performed in this study through the screening of twenty-three structural analogs  
376 of compound **1** to establish rudimentary structural activity relationship. Four analogs displayed  
377 good potency, including compounds **1k** and **1l** that were >100-fold more potent than the original  
378 hit. DMPK profiling, additional modifications to understand the SAR and to deal with possible  
379 metabolic hotspots (e.g. methoxy group, benzylic position) would be required as next steps to  
380 assess further the potential of this chemotype.

381 Overall, all the novel anti-*E. histolytica* hits identified from this study are structurally different  
382 from currently available drugs. Furthermore, they are selective against Vero cell lines and have  
383 favorable physicochemical properties. Very preliminary structure-activity-relationship has  
384 allowed to identify double-digit nanomolar inhibitors against *E. histolytica* in cellular assays. This  
385 suggests that medicinal chemistry efforts focusing on lead optimization could result in successful  
386 selection of a drug candidate for amoebiasis drug development.

## 387 **Acknowledgments**

388 Authors are very grateful to the strong institutional support from the University of Yaoundé 1,  
389 Cameroon.

390 MMV supported this work through a Pathogen Box Challenge grant (PO 15/01083[03]) to Prof.  
391 Boyom and provided the open access Pathogen Box and structural analogs.

392 *Entamoeba histolytica* strain NR-176 was obtained from BEI Resources, NIAID, NIH.

393 This work also received materials and equipment support from the Yaoundé- Bielefeld Bilateral  
394 Graduate School for Natural Products with Antiparasite and Antibacterial Activity (YaBiNaPA).

395 The study was also supported by the Seeding Labs' Instrumental Access Grant (SL2012-2) to Prof.  
396 Boyom.

397

## 398 **Competing Interests**

399 The authors declared there is no competing interests

## 400 **References**

401 1. UNICEF. Current status and progress: diarrhoea remains a leading killer of young children,  
402 despite the availability of a simple treatment solution. [https://data.unicef.org/topic/child-](https://data.unicef.org/topic/child-health/diarrhoeal-disease/#)  
403 [health/diarrhoeal-disease/#](https://data.unicef.org/topic/child-health/diarrhoeal-disease/#). Updated March 2018. Accessed April 4, 2018.

404 2. Shirley DT, Farr L, Watanabe K, Moonah S. A Review of the Global Burden, New  
405 Diagnostics, and Current Therapeutics for Amebiasis. *Open Forum Infect Dis.* 2018; 5(7):  
406 ofy161).

- 407       **3.** Mortimer L, Chadee K. The immunopathogenesis of *Entamoeba histolytica*. *Exp Parasitol.*  
408       2010; 126: 366–380.
- 409       **4.** Ghasemi E, Rahdar M, Rostami M. Prevalence of *Entamoeba histolytica/dispar* in  
410       drinking water in the city of Shush, Khuzestan Province in 2011. *Int. J. Curr. Microbiol.*  
411       *App. Sci.* 2015; 4: 582–588.
- 412       **5.** Petri WA, Haque R, Mann BJ. The bittersweet interface of parasite and host: Lectin-  
413       carbohydrate interactions during human invasion by the parasite *Entamoeba histolytica*.  
414       *Annu. Rev. Microbiol.* 2002; 56: 39–64.
- 415       **6.** Fotedar R, Stark D, Beebe N, Marriot D, Ellis J, Harkness J. Laboratory Diagnostic  
416       Techniques for *Entamoeba* Species. *Clin. Microbiol. Rev.* 2007; 20: 511–532.
- 417       **7.** Stanley SL Jr. Amoebiasis. *Lancet.* 2003; 361 (9362): 1025-1034.
- 418       **8.** Debnath A, Parsonage D, Andrade RM, He C, Cobo ER, Hirata K, et al. A high-throughput  
419       drug screen for *Entamoeba histolytica* identifies a new lead and target. *Nat. Med.* 2012;  
420       18, 956–960. doi: 10.1038/nm.2758
- 421       **9.** Escola-Verge L, Arando M, Vall M, et al. Outbreak of intestinal amoebiasis among men  
422       who have sex with men, Barcelona (Spain), October 2016 and January 2017. *Euro Surveill.*  
423       In press.
- 424       **10.** Marie C, Petri, WAJr. Amoebic dysentery. *BMJ Clin. Evid.* 2013:0918
- 425       **11.** Ansari MF, Siddiqui SM, Agarwal SM, Vikramdeo KS, Mondal N, Azam, A.  
426       Metronidazole hydrazone conjugates: design, synthesis, antiamoebic and molecular  
427       docking studies. *Bioorg. Med. Chem. Lett.* 2015; 25: 3545–3549. doi:  
428       10.1016/j.bmcl.2015.06.091

- 429       **12.** González-Alcaide G, Peris J, Ramos JM. Areas of research and clinical approaches to the  
430       study of liver abscess. *World J. Gastroenterol.* 2017; 23 (2):357-365.
- 431       **13.** World Health Organization. Available online:  
432       <http://www.who.int/ith/diseases/amoebiasis/en/>  
433       (accessed on 2 February 2015).
- 434       **14.** Johnson PJ. Metronidazole and drug resistance. *Parasitol. Today* 1993, 9, 183–186.  
435       Kim, D.; Park, J.; Yoon, B.; Baek, M.J.; Kim, J.E.; Kim, S.Y. Metronidazole-induced  
436       encephalopathy. *J. Neurol. Sci.* 2004; 224, 107–111.
- 437       **15.** Kuriyama A, Jackson JL, Doi A, Kamiya T. Metronidazole-induced central nervous system  
438       toxicity: A systematic review. *Clin. Neuropharmacol.* 2011; 34: 241–247.
- 439       **16.** Wassmann C, Hellberg A, Tannich E, Bruchhaus I. Metronidazole resistance in the  
440       protozoan parasite *Entamoeba histolytica* is associated with increased expression of iron-  
441       containing superoxide dismutase and peroxiredoxin and decreased expression of  
442       ferredoxin 1 and flavin reductase. *J. Biol. Chem.* 1999; 274: 26051–26056. doi:  
443       10.1074/jbc.274.37.26051
- 444       **17.** Toledano-Magaña Y, García-Ramos JC, Navarro-Olivarria M, Flores-Alamo M,  
445       Manzanera-Estrada M, Ortiz-Frade L, Galindo-Murillo R, Ruiz-Azuara L, Meléndrez-  
446       Luevano RM, Cabrera-Vivas BM. Potential Amoebicidal Activity of Hydrazone  
447       Derivatives: Synthesis, Characterization, Electrochemical Behavior, Theoretical Study and  
448       Evaluation of the Biological Activity. *Molecules* 2015; 20, 9929-9948.  
449       doi:10.3390/molecules20069929
- 450       **18.** Debnath A, Ndao M, Reed SL. Reprofiled drug targets ancient  
451       protozoans: drug discovery for parasitic diarrheal diseases. *Gut Microbes.* 2013; 4: 66–71.

- 452       **19.** Gonzales MM, Dans LF, Sio-Aguilar J. Antiamoebic drugs for treating amoebic colitis.  
453           Cochrane Database of Systematic Reviews. 2019; 1: CD006085. DOI:  
454           10.1002/14651858.CD006085.pub3
- 455       **20.** Chacín-Bonilla L. Current pharmacotherapy of amebiasis, advances in new drugs, and  
456           design of a vaccine. *Invest. Clin.* 2012; 53(3): 301 – 314
- 457       **21.** Van Voorhis WC, Adams JH, Adelfio R, Ahyong V, Akabas MH, Alano P, Alday A,  
458           Aleman Resto Y, Alsibae A, Alzualde A, Andrews KT, Avery SV, Avery VM, Ayong  
459           L, Baker M, Baker S, Ben Mamoun C, Bhatia S, Bickle Q, Bounaadja L, Bowling T,  
460           Bosch J, Boucher LE, Boyom FF, Brea J, Brennan M, Burton A, Caffrey CR,  
461           Camarda G, Carrasquilla M, Carter D, Belen Cassera M, Chih-Chien Cheng K,  
462           Chindaudomsate W, Chubb A, Colon BL, Colon-Lopez DD, Corbett Y, Crowther GJ,  
463           Cowan N, D'Alessandro S, Le Dang N, Delves M, DeRisi JL, Du AY, Duffy S, Abd El-  
464           Salam El-Sayed S, Ferdig MT, Fernandez Robledo JA, Fidock DA, et al. Open  
465           Source Drug Discovery with the Malaria Box Compound Collection for Neglected  
466           Diseases and Beyond. *PLoS Pathog.* 2016; 12:e1005763.
- 467       **22.** Lucantoni L, Duffy S, Adjalley SH, Fidock DA, Avery VM. Identification of MMV  
468           malaria box inhibitors of *Plasmodium falciparum* early-stage gametocytes using a  
469           luciferase-based high-throughput assay. *Antimicrob Agents Chemother.* 2013; 57:6050-  
470           62.
- 471       **23.** Bowman JD, Merino EF, Brooks CF, Striepen B, Carlier PR, Cassera MB. Antiapicoplast  
472           and gametocytocidal screening to identify the mechanisms of action of compounds within  
473           the malaria box. *Antimicrob Agents Chemother.* 2014; 58:811-9.

- 474       **24.** Ruecker A, Mathias DK, Straschil U, Churcher TS, Dinglasan RR, Leroy D, Sinden RE,  
475       Delves MJ. A male and female gametocyte functional viability assay to identify  
476       biologically relevant malaria transmission-blocking drugs. *Antimicrob Agents Chemother.*  
477       2014; 58:7292-302.
- 478       **25.** Bhardwaj A, Scaria V, Raghava GP, Lynn AM, Chandra N, Banerjee S, Raghunandan  
479       MV, Pandey V, Taneja B, Yadav J, Dash D, Bhattacharya J, Misra A, Kumar A,  
480       Ramachandran S, Thomas Z, Open Source Drug Discovery C, Brahmachari SK. 2011.  
481       Open source drug discovery--a new paradigm of collaborative research in tuberculosis drug  
482       development. *Tuberculosis (Edinb).* 2011; 91:479-86.
- 483       **26.** Ballell L, Bates RH, Young RJ, Alvarez-Gomez D, Alvarez-Ruiz E, Barroso V, Blanco D,  
484       Crespo B, Escribano J, Gonzalez R, Lozano S, Huss S, Santos-Villarejo A, Martin-Plaza  
485       JJ, Mendoza A, Rebollo-Lopez MJ, Remuinan-Blanco M, Lavandera JL, Perez-Herran E,  
486       Gamo-Benito FJ, Garcia-Bustos JF, Barros D, Castro JP, Cammack N. Fueling open-  
487       source drug discovery: 177 small-molecule leads against tuberculosis. *ChemMedChem*  
488       2013; 8:313-21.
- 489       **27.** Todd MH, Coaker H. Using an open source model to accelerate schistosomiasis drug  
490       research. *Future Med. Chem.* 2015; 7:689-92.
- 491       **28.** Ingram-Sieber K, Cowan N, Panic G, Vargas M, Mansour NR, Bickle QD, Wells TN,  
492       Spangenberg T, Keiser J. Orally active antischistosomal early leads identified from the  
493       open access malaria box. *PLoS Negl. Trop. Dis.* 2014; 8:e2610.
- 494       **29.** Ramamoorthi R, Graef KM, Dent J. Repurposing pharma assets: an accelerated mechanism  
495       for strengthening the schistosomiasis drug development pipeline. *Future Med. Chem.*  
496       2015; 7:727-35.

- 497       **30.** Kaiser M, Maes L, Tadoori LP, Spangenberg T, Ioset JR. Repurposing of the Open Access  
498       Malaria Box for Kinetoplastid Diseases Identifies Novel Active Scaffolds against  
499       Trypanosomatids. *J. Biomol. Screen.* 2015; 20: 634-45.
- 500       **31.** Bessoff K, Spangenberg T, Foderaro JE, Jumani RS, Ward GE, Huston CD. Identification  
501       of *Cryptosporidium parvum* active chemical series by Repurposing the  
502       open access malaria box. *Antimicrob Agents Chemother* 2014; 58:2731-9.
- 503       **32.** Boyom FF, Fokou PV, Tchokouaha LR, Spangenberg T, Mfopa AN, Kouipou RM,  
504       Mbouna CJ, Donfack VF, Zollo PH. Repurposing the open access malaria box to discover  
505       potent inhibitors of *Toxoplasma gondii* and *Entamoeba histolytica*. *Antimicrob Agents*  
506       *Chemother.* 2014; 58:5848-54.
- 507       **33.** Celik H, Hong SH, Colon-Lopez DD, Han J, Kont YS, Minas TZ, Swift M, Paige M,  
508       Glasgow E, Toretsky JA, Bosch J, Uren A. Identification of Novel Ezrin  
509       Inhibitors Targeting Metastatic Osteosarcoma by Screening Open Access Malaria  
510       Box. *Mol. Cancer. Ther.* 2015; 14:2497-507.
- 511       **34.** Mosmann T. Rapid Colorimetric Assay for Cellular Growth and Survival: Application to  
512       Proliferation and Cytotoxicity Assays. *Journal of Immunology Methods*; 1983; 65: 55-63.
- 513       **35.** Hughes JP, Rees S, Kalindjian SB, Philpott KL. Principles of early drug discovery. *Br J*  
514       *Pharmacol.* 2011; 162(6):1239–1249. doi:10.1111/j.1476-5381.2010.01127.x
- 515       **36.** Renslo AR, Robertson SA. Drug discovery for neglected tropical diseases at the Sandler  
516       Center. *Future Med. Chem.* 2011; 3(10): 1279-1288. doi: 10.4155/fmc.11.85.
- 517       **37.** Challenger CA. “Expediting the Discovery and Development of Drugs,”. *Pharmaceutical*  
518       *Technology.* 2017; 41(9): 24–25.

- 519       **38.** Marzano C, Gandin V, Folda A, Scutari G, Bindoli A, Rigobello MP. Inhibition of  
520           thioredoxin reductase by auranofin induces apoptosis in cisplatin-resistant human ovarian  
521           cancer cells. *Free Radic Biol Med.* 2007; 42(6):872–81
- 522       **39.** Pessetto ZY, Weir SJ, Sethi G, Broward MA, Godwin AK. Drug repurposing for  
523           gastrointestinal stromal tumor. *Mol. Cancer. Ther.* 2013; 12(7):1299–309.
- 524       **40.** Fan C, Zheng W, Fu X, Li X, Wong YS, Chen T. Enhancement of auranofin-induced lung  
525           cancer cell apoptosis by selenocystine, a natural inhibitor of TrxR1 *in vitro* and *in vivo*.  
526           *Cell Death Dis.* 2014; 5:e1191
- 527       **41.** Roder C, Thomson MJ. Auranofin: Repurposing an Old Drug for a Golden New Age.  
528           *Drugs RD.* 2015; 15:13–20.
- 529       **42.** Stephens CE, Tanious F., Kim S., Wilson WD, Schell WA, Perfect JR, Franzblau SG,  
530           Boykin DW. Diguanidino and “Reversed” Diamidino 2,5-Diarylfurans as Antimicrobial  
531           Agents. *J. Med. Chem.* 2001; 44: 1741-1748.
- 532       **43.** Ross BN, Myers JN, Muruato LA, Tapia D and Torres AG. Evaluating New Compounds  
533           to Treat *Burkholderia pseudomallei* Infections. *Front. Cell. Infect. Microbiol.* 2018; 8:210.  
534           doi: 10.3389/fcimb.2018.00210.
- 535       **44.** Rebollo-Lopez MJ, Lelievre J, Alvarez-Gomez D, Castro-Pichel, Martinez-Jimenez F,  
536           Papadatos G, et al. Release of 50 new, drug-like compounds and their computational target  
537           predictions for open source anti-tubercular drug discovery. *PLoS ONE.* 2015;  
538           10:e0142293. doi: 10.1371/journal.pone.0142293
- 539       **45.** Klokouzas A, Shahi S, Hladky SB, Barrand MA, van Veen HW. ABC transporters and  
540           drug resistance in parasitic protozoa. *Int J Antimicrob Agents.* 2003; 22(3):301-17.



- 541       **46.** Low JL, Mu-Lu W, Binte AD, Laleu B, Dick T. Screening of TB Actives for Activity  
542           against Nontuberculous Mycobacteria Delivers High Hit Rates. *Frontiers in microbiology*.  
543           2017; 8: 1539. DOI: 10.3389/fmicb.2017.01539
- 544       **47.** Jeong J, Kim G, Moon C, Kim HJ, Kim TH, Jang J. Pathogen Box screening for hit  
545           identification against *Mycobacterium abscessus*. *PloS one*. 2018; 13(4): e0195595.
- 546       **48.** Hennessey KM, Rogiers IC, Shih H-W, Hulverson MA, Choi R, McCloskey MC, et al.  
547           Screening of the Pathogen Box for inhibitors with dual efficacy against *Giardia lamblia*  
548           and *Cryptosporidium parvum*. *PLoS Negl Trop Dis*. 2018; 12(8): e0006673.
- 549       **49.** Rosowsky A, Mota CE, Wright JE, Queener SF. 2,4-Diamino- 5-chloroquinazoline  
550           analogues of trimetrexate and piritrexim: synthesis and antifolate activity. *J. Med. Chem*.  
551           1994; 37: 4522–4528. doi: 10.1021/jm00052a011.
- 552       **50.** Lau H, Ferlan JT, Brophy VH, Rosowsky A, Sibley CH. Efficacies of lipophilic inhibitors  
553           of dihydrofolate reductase against parasitic protozoa. *Antimicrobial Agents and*  
554           *Chemother*. 2001; 45 (1): 187-195 DOI:10.1128/AAC.45.1.187-195.2001.
- 555       **51.** Senkovich O, Bhatia V, Garg N, Chattopadhyay D. Lipophilic Antifolate Trimetrexate Is  
556           a Potent Inhibitor of *Trypanosoma cruzi*: Prospect for Chemotherapy of Chagas' Disease.  
557           *Antimicrobial Agents and Chemother*. 2005; 49 (8): 3234-3238.
- 558       **52.** Spalenka J, Escotte-Binet S, Bakiri A, Hubert J, Renault J, Velard F, Duchateau S, Aubert  
559           D, Huguenin A, Villena I. Discovery of new inhibitors of *Toxoplasma gondii* thanks to  
560           the Pathogen Box. *Antimicrobial agents Chemother*. 2017; Doi:10.1128/AAC.01640-17.
- 561       **53.** Lim W, Melse Y, Konings M, Phat Duong H, Eadie K, Laleu B, et al. Addressing the most  
562           neglected diseases through an open research model: The discovery of fenarimols as novel  
563           drug candidates for eumycetoma. *PLoS Negl Trop Dis*. 2018; 12(4): e0006437.

564        **54.** Schweitzer BI, Dicker AP, Bertino JR. Dihydrofolate reductase as a therapeutic target.  
565                *FASEB J.* 1990; 4:2441-2452

566        **55.** Ferone R, Roland S. Dihydrofolate reductase-thymidylate synthase, a bifunctional  
567                polypeptide from *Crithidia fasciculata*. *Proc. Natl. Acad. Sci. USA* 1980; 77:5802-5806.

568

## 569    **Supporting Information Legends**

570    **Table:** Amoebicidal potency of the hit compounds and their structural analogues.

571     $IC_{50}$  = Median inhibitory concentration of active compounds against *E. histolytica*;  $CC_{50}$  = Median cytotoxic  
572    concentration of active compounds against Vero cells;  $SI (CC_{50}/IC_{50})$  = Selectivity index

573
